# Supplementary material for: Deep learning-based relapse prediction of neuromyelitis optica spectrum disorder with anti-aquaporin-4 antibody
Source: PubMed Central journal article supplement (PMC9389264; doi:10.3389/fneur.2022.947974), 2022-08-05
Supplement: Data_Sheet_1.pdf [file Data_Sheet_1.pdf]

**Supplemental data to the article: ‘Deep Learning-Based Relapse Prediction of Neuromyelitis Optica Spectrum Disorder with Anti-Aquaporin-4 Antibody’**

**Table S1. Pairwise comparisons of maintenance therapy using log-rank test**

| Maintenance therapy   | No or prednisone < 6 months | Prednisone ≥ 6 months | AZA    | MMF    | TAC  | RTX     | CTX |
|-----------------------|-----------------------------|-----------------------|--------|--------|------|---------|-----|
| Prednisone > 6 months | < 0.001***                  | —                     | —      | —      | —    | —       | —   |
| AZA                   | < 0.001***                  | 0.225                 | —      | —      | —    | —       | —   |
| MMF                   | < 0.001***                  | 0.223                 | 0.695  | —      | —    | —       | —   |
| TAC                   | < 0.001***                  | 0.369                 | 0.735  | 0.946  | —    | —       | —   |
| RTX                   | < 0.001***                  | 0.787                 | 0.014* | 0.042* | 0.12 | —       | —   |
| CTX                   | 0.869                       | 0.017*                | 0.026* | 0.011* | 0.07 | 0.002** | —   |

AZA, azathioprine; MMF, mycophenolate mofetil; TAC, tacrolimus; RTX, rituximab; CTX, cyclophosphamide. \*p < 0.05, \*\*p < 0.01, \*\*\*p < 0.001.

**Table S2. Predictors calculated with minimal depth and VIMP from random survival forest model**

| Predictors                          | Minimal depth | VIMP   |
|-------------------------------------|---------------|--------|
| Maintenance therapy                 | 1.116         | 0.213  |
| EDSS score at treatment initiation  | 1.9           | 0.028  |
| Disease duration, months            | 2.24          | 0.033  |
| Previous attack under same therapy  | 2.328         | 0.038  |
| ARR of the most recent year         | 2.418         | 0.017  |
| Age at treatment initiation, years  | 2.684         | 0.011  |
| Phenotype of the most recent attack | 3.138         | -0.004 |
| AQP4-ab titer                       | 3.266         | 0.003  |
| Gender                              | 4.276         | 0.01   |

VIMP, variable importance; EDSS, Expanded Disability Status Scale; ARR, annualized relapse rate; AQP4-ab, aquaporin-4 antibody.

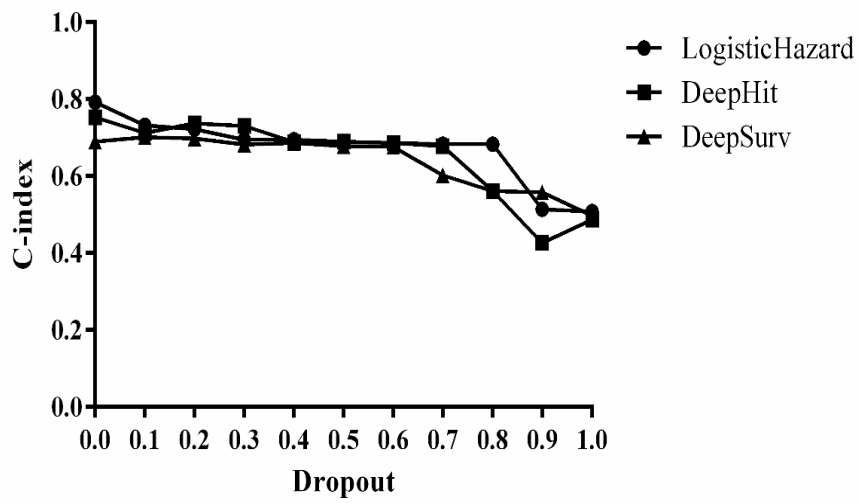

**Fig S1. The overall comparison of C-indexes with different dropouts using deep learning models in the training set.**
